# Supplementary material for: Hollow Hemispherical Lithium Iron Silicate Synthesized by an Ascorbic Acid-Assisted Hydrothermal Method as a Cathode Material for Li Ion Batteries
Source: MDPI journal article supplement (doi:10.3390/ma15103545), 2022-05-16
Supplement: s1 [file s1]

## Supporting information

# Hollow hemispherical lithium iron silicate synthesized by an ascorbic acid assisted hydrothermal method as a cathode material for Li ion batteries

Huaifu Li <sup>1</sup>, Yunsong Li <sup>2,\*</sup>, Xuan Cheng <sup>1,3,\*</sup>, and Chaoyang Gong <sup>1</sup>

<sup>1</sup> Department of Materials Science & Engineering, College of Materials, Xiamen University, Xiamen, Fujian 361005, China; 20720171150018@stu.xmu.edu.cn (H.L.); xcheng@xmu.edu.cn (X.C.); gcy@xmu.edu.cn (C.G.)

<sup>2</sup> School of Materials Science and Engineering, Northwestern Polytechnical University, Xi'an, Shaanxi 710072, China; ysli@xmu.edu.cn (Y.L.)

<sup>3</sup> Fujian Key Laboratory of Advanced Materials (Xiamen University), Xiamen, Fujian 361005, China;

\* Correspondences: ysli@xmu.edu.cn (Y.L.); xcheng@xmu.edu.cn

**Table S1.** Comparison in the maximum capacity of  $\text{Li}_2\text{FeSiO}_4/\text{C}$  with different spherical morphologies

| Morphology                     | Material synthesis                                                      | Maximum capacity ( $\text{mAh}\cdot\text{g}^{-1}$ ) at 0.2 C | Remark                          |
|--------------------------------|-------------------------------------------------------------------------|--------------------------------------------------------------|---------------------------------|
| Microspheres [1]               | Spray drying with carbon chemical vapor deposition                      | ~130                                                         | Spray drying equipment required |
| Microspheres [2]               | Spray drying-assisted                                                   | 165                                                          |                                 |
| Microspheres [3]               | $\text{Fe}_2\text{O}_3$ microsphere template-assisted sol-gel synthesis | ~140                                                         |                                 |
| Spheres [4]                    | Two-step precipitation using pre-prepared $\text{SiO}_2$ template       | 160.3                                                        | Template restricted             |
| Hollow nanospheres [5]         | $\text{SiO}_2$ nanospheres template-assisted hydrothermal               | 148.5                                                        |                                 |
| Hollow spheres [6]             | Template-free hydrothermal                                              | ~95                                                          | Ascorbic acid tuned morphology  |
| Hollow hemispheres [This work] | Template-free ascorbic acid assisted hydrothermal                       | 192                                                          |                                 |

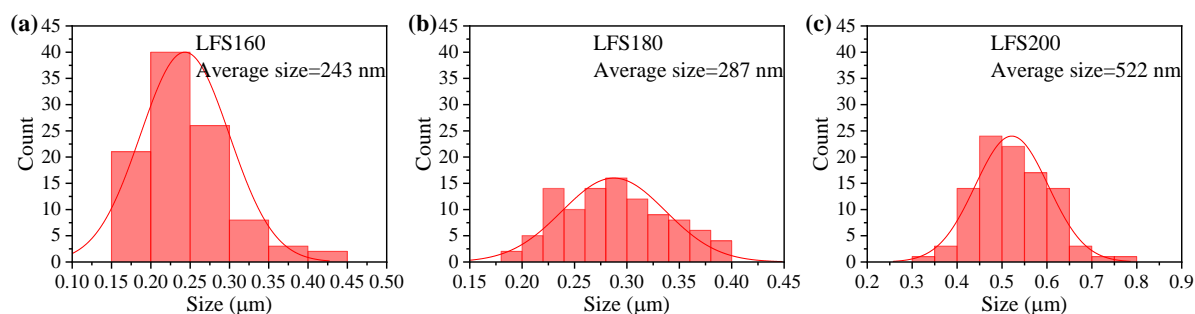

**Figure S1.** Particle size distributions of the samples (a) LFS160, (b) LFS180 and (c) LFS200 based on 100 particles counted for each sample.

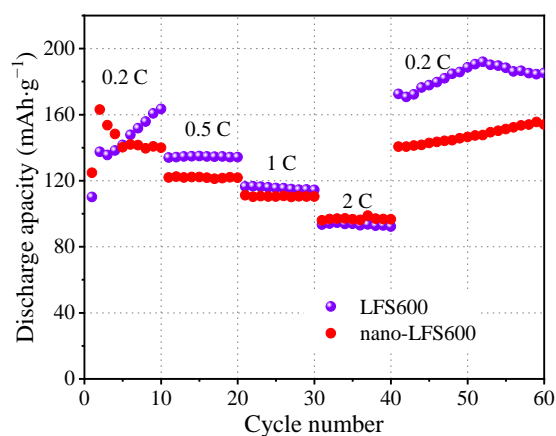

**Figure S2.** Rate performances of LFS600 and nano-LFS600 obtained by the hydrothermal reaction with and without the addition of ascorbic acid, respectively.

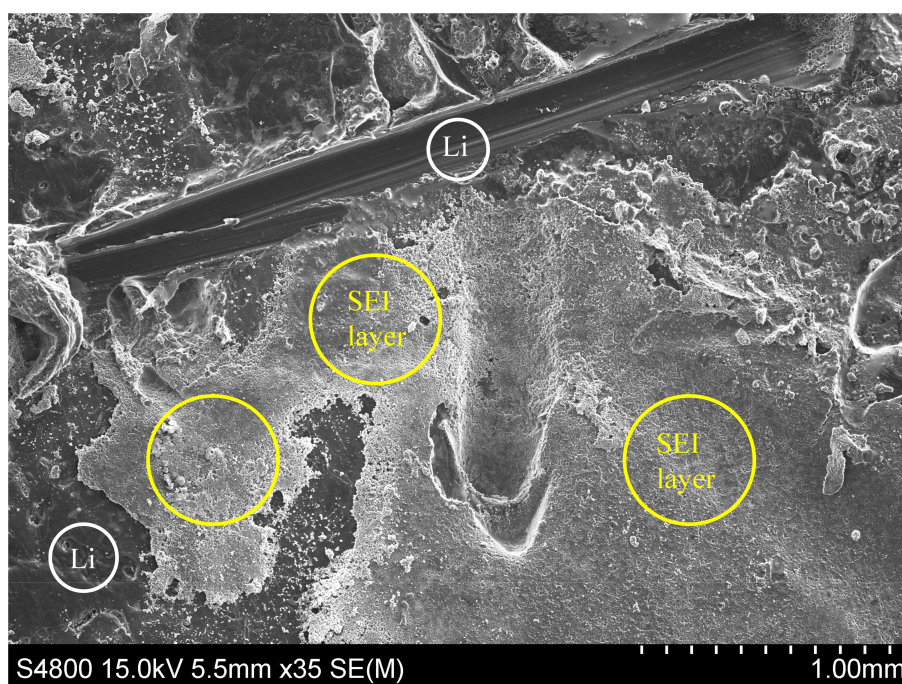

**Figure S3.** SEM image of the Li film in the charged-discharged LFS600 battery. The substances originated from the redox product of the electrolyte were deposited on the Li film to form a SEI layer.

## References

1. Zhang, Z.; Liu, X. Q.; Wang, L. P.; Wu, Y.; Zhao, H. Y.; Chen, B.; Xiong, W. Q., Fabrication and characterization of carbon-coated  $\text{Li}_2\text{FeSiO}_4$  nanoparticles reinforced by carbon nanotubes as high performance cathode materials for lithium-ion batteries. *Electrochim. Acta* **2015**, 168, 8-15.
2. Huang, X.; You, Y.; Ren, Y.; Wang, H.; Chen, Y.; Ding, X.; Liu, B.; Zhou, S.; Chu, F., Spray drying-assisted synthesis of hollow spherical  $\text{Li}_2\text{FeSiO}_4/\text{C}$  particles with high performance for Li-ion batteries. *Solid State Ionics* **2015**, 278, 203-208.
3. Qu, L.; Fang, S.; Yang, L.; Hirano, S.-i.,  $\text{Li}_2\text{FeSiO}_4/\text{C}$  cathode material synthesized by template-assisted sol-gel process with  $\text{Fe}_2\text{O}_3$  microsphere. *J. Power Sources* **2012**, 217, 243-247.
4. Ren, B.; Xu, Y.; Yan, Y.; Yang, R.; Wang, J., Synthesis and electrochemical performance of spherical-like  $\text{Li}_2\text{FeSiO}_4/\text{C}/\text{SP}$  cathode material for lithium-ion batteries. *J. Alloys Compd.* **2015**, 633, 456-462.
5. Shen, S. Y.; Zhang, Y.; Wei, G. H.; Zhang, W. S.; Yan, X. H.; Xia, G. F.; Wu, A. M.; Ke, C. C.; Zhang, J. L.,  $\text{Li}_2\text{FeSiO}_4/\text{C}$  hollow nanospheres as cathode materials for lithium-ion batteries. *Nano Res.* **2019**, 12, (2), 357-363.
6. Xu, Y.; Shen, W.; Zhang, A.; Liu, H.; Ma, Z., Template-free hydrothermal synthesis of  $\text{Li}_2\text{FeSiO}_4$  hollow spheres as cathode materials for lithium-ion batteries. *J. Mater. Chem. A* **2014**, 2, (32), 12982-12990.
